# Supplementary material
Source: PubMed Central journal article supplement (PMC10389774)
Supplement: PEDS_2022060531SupplementaryData.pdf [file PEDS_2022060531SupplementaryData.pdf]

## Supplemental Information

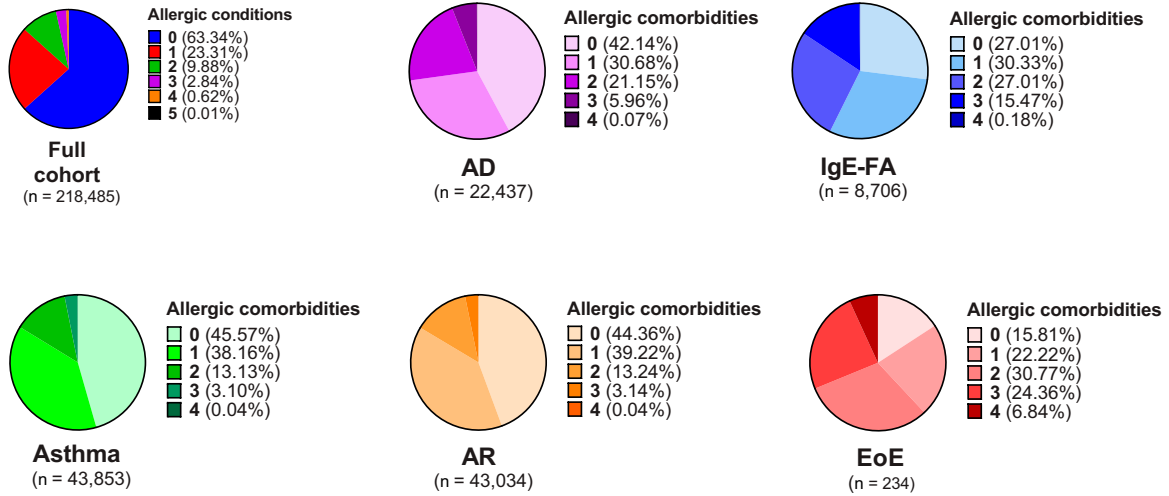

### SUPPLEMENTAL FIGURE 5

Allergic multimorbidity. Percentage of subjects in the full birth cohort who had 1 to 5 allergic manifestations, and subjects in the atopic dermatitis (AD), immunoglobulin E-mediated food allergy (IgE-FA), asthma, allergic rhinitis (AR), and eosinophilic esophagitis (EoE) subcohorts who had 1 to 4 allergic comorbidities.

**SUPPLEMENTAL TABLE 7** Geographic Distribution of Subjects

| West         |               |               | Midwest      |               |                | Northeast     |                |                | South                |               |               | Unknown    |               | All Regions    |            |
|--------------|---------------|---------------|--------------|---------------|----------------|---------------|----------------|----------------|----------------------|---------------|---------------|------------|---------------|----------------|------------|
| State        | n             | %             | State        | n             | %              | State         | n              | %              | State                | n             | %             | n          | %             | n              | %          |
| Alaska       | 1113          | 0.5094        | Illinois     | 23            | 0.0105         | Connecticut   | 18             | 0.0082         | Alabama              | 9             | 0.0041        | 353        | 0.1616        | 218 485        | 100        |
| Arizona      | 21            | 0.0096        | Indiana      | 14 623        | 6.6929         | Maine         | 3              | 0.0014         | Arkansas             | 368           | 0.1684        |            |               |                |            |
| California   | 34            | 0.0156        | Iowa         | 7             | 0.0032         | Massachusetts | 6814           | 3.1187         | Delaware             | 1420          | 0.6499        |            |               |                |            |
| Colorado     | 39            | 0.0179        | Kansas       | 29            | 0.0133         | New Hampshire | 8              | 0.0037         | District of Columbia | 1             | 0.0005        |            |               |                |            |
| Hawaii       | 5             | 0.0023        | Michigan     | 16            | 0.0073         | New Jersey    | 15 900         | 7.2774         | Florida              | 129           | 0.0590        |            |               |                |            |
| Idaho        | 950           | 0.4348        | Minnesota    | 15            | 0.0069         | New York      | 955            | 0.4371         | Georgia              | 1065          | 0.4874        |            |               |                |            |
| Montana      | 2             | 0.0009        | Missouri     | 3896          | 1.7832         | Pennsylvania  | 113 375        | 51.8914        | Kentucky             | 207           | 0.0947        |            |               |                |            |
| Nevada       | 5             | 0.0023        | Nebraska     | 1             | 0.0005         | Rhode Island  | 11             | 0.0050         | Louisiana            | 4             | 0.0018        |            |               |                |            |
| New Mexico   | 51            | 0.0233        | North Dakota | 1             | 0.0005         | Vermont       | 2068           | 0.9465         | Maryland             | 188           | 0.0860        |            |               |                |            |
| Oregon       | 6180          | 2.8286        | Ohio         | 26 850        | 12.2892        |               |                |                | Mississippi          | 4             | 0.0018        |            |               |                |            |
| Utah         | 12            | 0.0055        | Wisconsin    | 438           | 0.2005         |               |                |                | North Carolina       | 3139          | 1.4367        |            |               |                |            |
| Washington   | 4049          | 1.8532        |              |               |                |               |                |                | Oklahoma             | 9             | 0.0041        |            |               |                |            |
| Wyoming      | 1             | 0.0005        |              |               |                |               |                |                | South Carolina       | 8988          | 4.1138        |            |               |                |            |
|              |               |               |              |               |                |               |                |                | Tennessee            | 2596          | 1.1882        |            |               |                |            |
|              |               |               |              |               |                |               |                |                | Texas                | 2440          | 1.1168        |            |               |                |            |
|              |               |               |              |               |                |               |                |                | Virginia             | 46            | 0.0211        |            |               |                |            |
|              |               |               |              |               |                |               |                |                | West Virginia        | 6             | 0.0027        |            |               |                |            |
| <b>Total</b> | <b>12 462</b> | <b>5.7038</b> |              | <b>45 899</b> | <b>21.0078</b> |               | <b>139 152</b> | <b>63.6895</b> |                      | <b>20 619</b> | <b>9.4373</b> | <b>353</b> | <b>0.1616</b> | <b>218 485</b> | <b>100</b> |

**SUPPLEMENTAL TABLE 8** Rural-Urban Distribution of Subjects

| RUCA Code | Description                                                                   | <i>n</i> | %      |
|-----------|-------------------------------------------------------------------------------|----------|--------|
| 1         | Metropolitan area core: primary flow within an UA                             | 195 440  | 89.452 |
| 2         | Metropolitan area high commuting: primary flow 30% or more to an UA           | 4987     | 2.283  |
| 3         | Metropolitan area low commuting: primary flow 10%–30% to an UA                | 97       | 0.044  |
| 4         | Micropolitan area core: primary flow within an UC of 10 000–49 999 (large UC) | 1979     | 0.906  |
| 5         | Micropolitan high commuting: primary flow 30% or more to a large UC           | 117      | 0.054  |
| 6         | Micropolitan low commuting: primary flow 10% to 30% to a large UC             | 80       | 0.037  |
| 7         | Small town core: primary flow within an UC of 2500–9999 (small UC)            | 229      | 0.105  |
| 8         | Small town high commuting: primary flow 30% or more to a small UC             | 25       | 0.011  |
| 9         | Small town low commuting: primary flow 10%–30% to a small UC                  | 16       | 0.007  |
| 10        | Rural areas: primary flow to a tract outside an UA or UC                      | 145      | 0.066  |
| NA        | No ZIP code information available                                             | 15 370   | 7.035  |

RUCA, rural-urban commuting code; UA, urbanized area; UC, urban cluster.

**SUPPLEMENTAL TABLE 9** Allergic Disease Definitions and Criteria

| Allergic Disease | ICD Code(s)                                                  | SNOMED Code | Inclusion Criteria                                                                                                                                                                                                                                                                                                                        | Exclusions                                                                                                                                                             |
|------------------|--------------------------------------------------------------|-------------|-------------------------------------------------------------------------------------------------------------------------------------------------------------------------------------------------------------------------------------------------------------------------------------------------------------------------------------------|------------------------------------------------------------------------------------------------------------------------------------------------------------------------|
| AD               | 691.nn, L20.nn                                               | 24079001    | Minimum 180-d span of diagnosis                                                                                                                                                                                                                                                                                                           |                                                                                                                                                                        |
| IgE-FA           | V15.0[1-5], 995.[6-7], 995.7, Z91.01[0-3], Z91.018, T78.1XXA | 414285001   | Minimum 180-d span of diagnosis; food allergen in diagnosis name (ie, egg, cow's milk, soy, wheat, peanut, walnut, pecan, pistachio, cashew, almond, hazelnut, brazil nut, sesame, fish, tuna, whitefish, salmon, shellfish, clam, crab, lobster, mussel, oyster, scallop, or shrimp); prescription of epinephrine on at least 1 occasion | Subjects with celiac disease recoded as non-wheat allergic; subjects with lactose intolerance recoded as non-milk allergic; milk protein sensitivity (SNOMED 15911003) |
| Asthma           | 493.n, J45.nn                                                | 195967001   | Minimum 180-d span of diagnosis; prescription of short-acting $\beta$ agonist and steroid inhalant on at least 2 separate dates after 1 y of age                                                                                                                                                                                          | Asthma diagnosis before age 1 y; exclusive diagnosis of reactive airway disease and/or postviral wheeze                                                                |
| AR               | 477.nn, J30.n                                                | 61582004    | Minimum 180-d span of diagnosis                                                                                                                                                                                                                                                                                                           |                                                                                                                                                                        |
| EoE              | 530.13, K20.0                                                | 735455001   | Minimum 1 occasion                                                                                                                                                                                                                                                                                                                        |                                                                                                                                                                        |

AD, atopic dermatitis; AR, allergic rhinitis; EoE, eosinophilic esophagitis; IgE-FA, immunoglobulin E-mediated food allergy.

**SUPPLEMENTAL TABLE 10** Search Terms for Individual IgE-Mediated Food Allergies

| Food Allergens | Search Terms                                                                                      | Exclusions                                                                         |
|----------------|---------------------------------------------------------------------------------------------------|------------------------------------------------------------------------------------|
| Egg            | 'egg ^egg'                                                                                        | 'family history drug eggplant eggnog'                                              |
| Milk           | 'milk.*allerg allerg.*milk'                                                                       | 'family history intoleran'                                                         |
| Soy            | 'soy'                                                                                             | 'family history intoleran'                                                         |
| Wheat          | 'wheat'                                                                                           | 'family history buckwheat intoleran'                                               |
| Fish           | 'fish tuna whitefish salmon'                                                                      | 'shell jelly  <i>Salmonella</i>  Salmon patch poison toxic trisomy family history' |
| Shellfish      | 'shellfish clam, clam  clam\$ crab, crab  crab\$ lobster, lobster\$ mussel oyster scallop shrimp' | 'poison toxic family history'                                                      |
| Peanut         | 'peanut'                                                                                          | 'family history flavor'                                                            |
| Tree nut       | 'tree.*nut'                                                                                       | 'family history flavor'                                                            |
| Walnut         | 'walnut'                                                                                          | 'family history flavor'                                                            |
| Pecan          | 'pecan'                                                                                           | 'family history flavor'                                                            |
| Pistachio      | 'pistachio'                                                                                       | 'family history flavor'                                                            |
| Almond         | 'almond'                                                                                          | 'family history flavor'                                                            |
| Brazil nut     | 'brazil'                                                                                          | 'family history flavor'                                                            |
| Hazelnut       | 'hazelnut'                                                                                        | 'family history flavor'                                                            |
| Cashew         | 'cashew'                                                                                          | 'family history flavor'                                                            |
| Sesame         | 'sesame'                                                                                          | 'family history flavor'                                                            |

For each food allergen, the terms were searched for within the condition source description.

**SUPPLEMENTAL TABLE 11** Distribution of Subjects by Observation Time

| Duration (y) | <i>n</i> | % of Total |
|--------------|----------|------------|
| 5            | 32 583   | 14.9       |
| 6            | 30 662   | 14.0       |
| 7            | 25 799   | 11.8       |
| 8            | 22 862   | 10.5       |
| 9            | 19 444   | 8.9        |
| 10           | 16 450   | 7.5        |
| 11           | 17 721   | 8.1        |
| 12           | 14 860   | 6.8        |
| 13           | 12 939   | 5.9        |
| 14           | 10 851   | 5.0        |
| 15           | 7 104    | 3.3        |
| 16           | 4 351    | 2.0        |
| 17           | 2 057    | 0.9        |
| 18           | 802      | 0.4        |

| <b>SUPPLEMENTAL TABLE 12</b> Most Common Combinations of Food Allergens in Subjects With Multiple Immunoglobulin E–Mediated Food Allergies |  |  |          |       |                                     |  |     |       |
|--------------------------------------------------------------------------------------------------------------------------------------------|--|--|----------|-------|-------------------------------------|--|-----|-------|
| <b>2 Food Allergens</b>                                                                                                                    |  |  | <i>n</i> | %     | <b>3 Food Allergens</b>             |  |     |       |
| Peanut, tree nut                                                                                                                           |  |  | 324      | 21.0  | Egg, milk, peanut                   |  | 123 | 19.3  |
| Egg, peanut                                                                                                                                |  |  | 310      | 20.1  | Peanut, fish, shellfish             |  | 74  | 11.6  |
| Peanut, shellfish                                                                                                                          |  |  | 161      | 10.4  | Egg, peanut, tree nut               |  | 60  | 9.4   |
| Egg, milk                                                                                                                                  |  |  | 108      | 7.0   | Egg, peanut, shellfish              |  | 51  | 8.0   |
| Peanut, sesame                                                                                                                             |  |  | 106      | 6.9   | Peanut, tree nut, sesame            |  | 39  | 6.1   |
| Total, top 5 combinations                                                                                                                  |  |  | 1009     | 65.3  | Total, top 5 combinations           |  | 347 | 54.4  |
| Total, subjects with 2 allergens                                                                                                           |  |  | 1546     | 100.0 | Total, subjects with 3 allergens    |  | 638 | 100.0 |
| <b>4 food allergens</b>                                                                                                                    |  |  | <i>n</i> | %     | <b>≥5 food allergens</b>            |  |     |       |
| Egg, peanut, fish, shellfish                                                                                                               |  |  | 30       | 13.2  | Egg, milk, peanut, fish, shellfish  |  | 19  | 12.3  |
| Egg, milk, peanut, shellfish                                                                                                               |  |  | 18       | 7.9   | Egg, milk, peanut, tree nut, sesame |  | 8   | 5.2   |
| Egg, milk, peanut, sesame                                                                                                                  |  |  | 17       | 7.5   | Egg, milk, soy, peanut, shellfish   |  | 8   | 5.2   |
| Egg, milk, peanut, fish                                                                                                                    |  |  | 16       | 7.0   | Egg, milk, soy, peanut, tree nut    |  | 6   | 3.9   |
| Egg, milk, peanut, tree nut                                                                                                                |  |  | 16       | 7.0   | Egg, soy, peanut, fish, shellfish   |  | 5   | 3.2   |
| Total, top 5 combinations                                                                                                                  |  |  | 97       | 42.7  | Total, top 5 combinations           |  | 46  | 29.7  |
| Total, subjects with 4 allergens                                                                                                           |  |  | 227      | 100.0 | Total, subjects with ≥5 allergens   |  | 155 | 100.0 |

| <b>SUPPLEMENTAL TABLE 13</b> Age at Diagnosis of Immunoglobulin E–Mediated Tree Nut Allergies |          |       |          |       |           |       |          |       |            |       |          |       |          |       |
|-----------------------------------------------------------------------------------------------|----------|-------|----------|-------|-----------|-------|----------|-------|------------|-------|----------|-------|----------|-------|
| Age Range (mo)                                                                                | Walnut   |       | Pecan    |       | Pistachio |       | Almond   |       | Brazil Nut |       | Hazelnut |       | Cashew   |       |
|                                                                                               | <i>n</i> | %     | <i>n</i> | %     | <i>n</i>  | %     | <i>n</i> | %     | <i>n</i>   | %     | <i>n</i> | %     | <i>n</i> | %     |
| 0–<6                                                                                          | 2        | 0.7   | 0        | 0.0   | 2         | 0.9   | 1        | 0.7   | 0          | 0.0   | 1        | 0.6   | 7        | 1.7   |
| 6–<12                                                                                         | 5        | 1.7   | 0        | 0.0   | 1         | 0.4   | 2        | 1.4   | 0          | 0.0   | 2        | 1.3   | 4        | 1.0   |
| 12–<18                                                                                        | 9        | 3.1   | 5        | 3.3   | 7         | 3.1   | 8        | 5.8   | 0          | 0.0   | 2        | 1.3   | 17       | 4.2   |
| 18–<24                                                                                        | 9        | 3.1   | 3        | 2.0   | 1         | 0.4   | 5        | 3.6   | 1          | 8.3   | 4        | 2.5   | 21       | 5.2   |
| 24–<30                                                                                        | 21       | 7.1   | 9        | 5.9   | 7         | 3.1   | 10       | 7.2   | 0          | 0.0   | 8        | 5.1   | 40       | 10.0  |
| 30–<36                                                                                        | 22       | 7.5   | 7        | 4.6   | 17        | 7.5   | 8        | 5.8   | 0          | 0.0   | 3        | 1.9   | 29       | 7.2   |
| 36–<42                                                                                        | 17       | 5.8   | 8        | 5.3   | 11        | 4.8   | 9        | 6.5   | 1          | 8.3   | 12       | 7.6   | 25       | 6.2   |
| 42–<48                                                                                        | 15       | 5.1   | 10       | 6.6   | 13        | 5.7   | 8        | 5.8   | 1          | 8.3   | 5        | 3.2   | 16       | 4.0   |
| 48–<54                                                                                        | 29       | 9.9   | 20       | 13.2  | 18        | 7.9   | 13       | 9.4   | 1          | 8.3   | 10       | 6.3   | 34       | 8.5   |
| 54–<60                                                                                        | 17       | 5.8   | 6        | 3.9   | 13        | 5.7   | 3        | 2.2   | 1          | 8.3   | 9        | 5.7   | 20       | 5.0   |
| ≥60                                                                                           | 148      | 50.3  | 84       | 55.3  | 138       | 60.5  | 71       | 51.4  | 7          | 58.7  | 102      | 64.6  | 188      | 46.9  |
| Total                                                                                         | 294      | 100.0 | 152      | 100.0 | 228       | 100.0 | 138      | 100.0 | 12         | 100.0 | 158      | 100.0 | 401      | 100.0 |

| <b>SUPPLEMENTAL TABLE 14</b> Cumulative Incidences of Immunoglobulin E–Mediated Tree Nut Allergies |          |      |          |      |           |      |          |      |            |      |          |      |          |      |
|----------------------------------------------------------------------------------------------------|----------|------|----------|------|-----------|------|----------|------|------------|------|----------|------|----------|------|
| Age Range (y)                                                                                      | Walnut   |      | Pecan    |      | Pistachio |      | Almond   |      | Brazil Nut |      | Hazelnut |      | Cashew   |      |
|                                                                                                    | <i>n</i> | %    | <i>n</i> | %    | <i>n</i>  | %    | <i>n</i> | %    | <i>n</i>   | %    | <i>n</i> | %    | <i>n</i> | %    |
| 0–<3                                                                                               | 100      | 0.05 | 42       | 0.02 | 59        | 0.03 | 51       | 0.02 | 3          | 0.00 | 37       | 0.02 | 159      | 0.07 |
| 0–<5                                                                                               | 192      | 0.09 | 91       | 0.04 | 113       | 0.05 | 79       | 0.04 | 8          | 0.00 | 80       | 0.04 | 251      | 0.11 |
| 0–<11                                                                                              | 272      | 0.12 | 139      | 0.06 | 215       | 0.10 | 117      | 0.05 | 12         | 0.01 | 145      | 0.07 | 370      | 0.17 |
| 0–<14                                                                                              | 291      | 0.13 | 149      | 0.07 | 225       | 0.10 | 138      | 0.06 | 12         | 0.01 | 156      | 0.07 | 398      | 0.18 |
| 0–18                                                                                               | 294      | 0.13 | 152      | 0.07 | 228       | 0.10 | 138      | 0.06 | 12         | 0.01 | 158      | 0.07 | 401      | 0.18 |
